# Supplementary material for: The Efficacy and Safety of Vitamin C for Iron Supplementation in Adult Patients With Iron Deficiency Anemia: A Randomized Clinical Trial
Source: PubMed Central journal article supplement (PMC7607440; doi:10.1001/jamanetworkopen.2020.23644), 2020-11-02
Supplement: jamanetwopen-e2023644-s001.pdf [file jamanetwopen-e2023644-s001.pdf]

1     **The Efficacy and Safety of Vitamin C for Iron Supplementation in**  
2             **Adult patients with Iron Deficiency Anemia: A Randomized**  
3                     **Clinical Trial**

4  
5     **Registry: Clinicaltrials.gov (NCT02631668)**

6     **Effective date: 1/2016 - 12/2018**

7     **Research Unit: Department of hematology, Huashan Hospital**

8     **Scientific Participants:**

9     **Xiaoqin Wang (Primary Investigator), MD, PhD,**

10    **Deputy Director of Department of hematology, Huashan Hospital, Fudan**  
11    **University**

12    **Email: wangxiaoqin@shmu.edu.cn**

13    **Nianyi Li, MD, PhD**

14    **Department of Hematology, Huashan Hospital, Fudan University**

15    **Email: nianyili@gmail.com**

16    **Wei Wang, MD**

17    **Department of Hematology, Huashan Hospital, Fudan University**

18    **Email: ciwei108@sina.com**

19    **Guangjie Zhao, MD**

20    **Department of Hematology, Huashan Hospital, Fudan University**

21    **Email: zhaoguangjie@163.com**

22

23

## **Contents**

24

25 1. Background

26 2. Objective

27 3. Research Design

28 4. Inclusion and Exclusion

29 5. Medication Regimen

30 6. Randomization

31 7. Sample Size

32 8. Endpoint Evaluation

33 9. Study Flow Chat

34 10. Regulations of Reporting of Adverse Events

35 11. Data Management

36 12. Statistical Analysis

37 13. Quality Control

38 14. Ethical standard

39 15. References

40 16. Report Form of Adverse Events

41

42

43

44

45

## 46 **1. Background**

47 Iron deficiency anemia (IDA) is associated with a decrease in erythropoiesis  
48 caused by a deficit in total body iron.<sup>1</sup> Iron deficiency is the leading cause of  
49 anemia worldwide. According to the WHO Guideline, IDA affects 30% of the  
50 world's population, indicating that it is still a problem requiring attention.<sup>2</sup>  
51 Iron deficiency can be divided into three stages: pre-latent iron deficiency, latent  
52 iron deficiency (also called iron-deficient erythropoiesis, IDE), and iron  
53 deficiency anemia (IDA). At the first stage, a lower iron intake (than the  
54 requirement) causes progressive depletion of iron storage primarily in the liver  
55 and muscle cells. This stage generally has no symptoms and is often diagnosed  
56 when serum ferritin (storage form of iron) levels drop below 20 ug/L. Continued  
57 iron storage depletion leads to the second stage, IDE phase, when iron  
58 deficiencies progress and begin to affect Erythropoiesis. In spite of an increased  
59 transferrin level, serum iron level decreases along with transferrin saturation.  
60 Erythropoiesis impairment begins when the serum iron level falls to less than 9  
61 umol/L and transferrin saturation is less than 16%.<sup>3</sup> Hemoglobin levels are still  
62 within the normal range until IDA stage. Iron storages are depleted to a point  
63 where it can no longer support the hemoglobin production required to make  
64 enough red blood cells. Deficiency impairs RBC synthesis, and hemoglobin  
65 production declines to the point where anemia develops.<sup>4</sup>  
66 During the pre-latent iron deficiency phase, most situations can be treated  
67 through an iron-rich diet. However, patients diagnosed with IDA need iron  
68 supplements promptly to restore the symptoms, and more importantly,  
69 investigating and addressing the underlying causes of IDA such as  
70 iron-absorption defects and bleeding.  
71 Oral iron supplementation is the major way to restore iron levels for IDA patients.  
72 Numerous non-heme iron supplements are available, among which the most  
73 commonly used are ferrous sulfate and ferric succinate. Vitamin C is the only  
74 dietary constituent other than animal tissue that has been shown to promote  
75 iron absorption.<sup>5-8</sup> Iron absorption occurs predominantly in the duodenum and

76 upper jejunum, where only ferrous iron can be transported into small intestine  
77 mucosal epithelial cells. When taken orally, iron is always oxidized to the  
78 Fe<sup>3+</sup> state from different original forms. It requires an acidic GI environment to  
79 properly dissolve and to be available for absorption. Vitamin C can create a more  
80 acidic environment in the stomach and prevent the oxidization of ferrous iron to  
81 ferric iron.<sup>9</sup> However, in a series of 12 individuals treated with iron during an  
82 intake of a normal or vitamin C supplemented diet, the augmentation of vitamin  
83 C on iron absorption from a complete diet is far less pronounced than that from  
84 a single meal. The facilitating effect in iron status of vitamin C with a complete  
85 diet has been minimal.<sup>7,10</sup> Therefore, whether Vitamin C has additional  
86 advantages, such as improving the efficacy of the iron tablets, speeding up the  
87 recovery of anemia, should be reconsidered. Some doctors might recommend  
88 taking iron tablets with vitamin C supplements while others may not. Their  
89 experience-based recommendations lack a support from clinical evidence  
90 through Randomized Controlled Trial (RCT), which is considered to be the most  
91 reliable form of scientific evidence.

92 With the rising of concept of evidence-based medicine, some shortcomings of  
93 empirical medicine were gradually exposed. For example, most experts used  
94 lidocaine as standard treatment for acute myocardial infarction until 1999, when  
95 Sadowski et al evaluated totally 21 randomized controlled trials (RCTs). The  
96 result showed that in patients receiving lidocaine treatment, although the  
97 incidence of ventricular fibrillation in patients with acute myocardial infarction  
98 was reduced, the mortality increased significantly. It concluded that using  
99 lidocaine to prevent ventricular fibrillation in patients with acute myocardial  
100 infarction was not recommended<sup>11</sup>. We believe that pathophysiological or  
101 mechanistic feasibility may not be able to achieve desired results in patients.  
102 Evidence-based medicine emphasizes that randomized controlled trial (RCT), as  
103 a gold standard for efficacy evaluation, should be apply for all therapies.  
104 Therefore, it is necessary to conduct a rigorous RCT study to evaluate whether  
105 vitamin C can increase the iron supplements efficacy. We designed a single-center,

106 randomized controlled, equivalent clinical trial to study the efficacy and safety  
107 between taking iron pills only and with vitamin C supplements. The aim of this  
108 study was to evaluate whether vitamin C supplements can speed up the recovery  
109 of IDA and whether this produces any side effects, such as increased  
110 gastrointestinal irritation stimulated by iron therapy itself.

111

## 112 **2. Objectives**

### 113 **2.1 Primary Objective**

114 To explore whether oral iron tablets supplemented with vitamin C can speed up  
115 the recovery of IDA stimulated by iron therapy itself.

116

### 117 **2.2 Secondary Objective**

118 To explore whether vitamin C supplement increases the incidence of the adverse  
119 events, such as increased gastrointestinal irritation stimulated by iron therapy  
120 itself.

121

## 122 **3. Research Design**

123 This study is an open-label, randomized, single-center clinical trial. Patients will  
124 be randomized to two groups using STATA 11.0 software. Participants are  
125 randomly assigned (1:1) to the oral iron tablets supplemented with vitamin C  
126 group or the oral iron tablets used as single-drug treatment group. Patients are  
127 randomized to receive 100mg oral iron tablet plus 200mg vitamin C supplements  
128 every 8 hours daily (n=220) or 100mg iron tablet every 8 hours (n=220) for 3  
129 months.

130

131

## 132 **4. Inclusion and Exclusion**

### 133 **4.1 Diagnostic Criteria for IDA**

134 Hemoglobin level less than 130g/L for men or 120 g/L for women, Mean  
135 Corpuscular Volume (MCV) less than 80fl, Mean Corpuscular Hemoglobin (MCH)

136 less than 27pg, Mean Corpuscular Hemoglobin Concentration (MCHC) less than  
137 320g/L, Serum Ferritin level less than 14ug/L for women or 30ug/L for men,  
138 Serum iron less than 7umol/L for women or 10um/L for men, Transferring  
139 saturation (TFs) less than 0.20, Total Iron Bind Capacity (TIBC) exceeding  
140 76.6umol/L

141

#### 142 **4.2 Inclusion Criteria**

143 Adult outpatients, who were newly diagnosed with IDA from 1/1/2016 to  
144 12/30/2017 in Huashan Hospital, Fudan University, and had not received any  
145 iron-supplement therapy, were screened for enrollment. The inclusion criteria  
146 were age of at least 18 years old, meeting IDA diagnostic criteria, and being  
147 voluntary to sign the informed consent.

148

#### 149 **4.3 Exclusion Criteria**

150 (1) Pregnancy; (2) Severe stomachache or intestinal ulcers; (3) Intolerable an oral  
151 iron treatment; (4) Serious uncorrectable bleeding; (5) Drug Allergy; (6) Severe  
152 liver dysfunction (The levels of ALT and AST increase to two times higher than  
153 normal); (7) Cardiovascular Disease; (8) Renal insufficiency; (9) Participate in  
154 other clinical trials; (10) Disagree to sign the informed consent.

155

#### 156 **4.4 Termination Criteria**

157 (1) Subjects with poor compliance or special reasons, and research drug cannot  
158 be used on time; (2) Patients use other drugs that may affect efficacy of research  
159 drug or tolerance judgment; (3) Subjects are reluctant to continue clinical trials;; (4)  
160 Serious adverse effects occur in clinical trial; (5) Other symptoms of concurrent  
161 disease worsened in clinical trial and need urgent treatment.

162

163

164 **5. Medication Regimen**165 **5.1 Research drug.**

| Drug              | Form   | Specification | Storage                                      | Lot.                         | Company                                         |
|-------------------|--------|---------------|----------------------------------------------|------------------------------|-------------------------------------------------|
| ferrous succinate | tablet | 0.1g/tablet   | Shading,<br>Airtight,<br>Room<br>temperature | SFDA<br>number;<br>H20083003 | Sichuan,<br>Aobang pharmaceutical<br>co., Ltd.  |
| Vitamin C         | tablet | 0.1g/tablet   | Shading,<br>Airtight,<br>Room<br>temperature | SFDA<br>number;<br>H42020614 | Hubei,<br>Huazhong,<br>pharmaceutical co., Ltd. |

166

167 **5.2 Treatment Regimen**

| Code | Group              | Treatment                                            |
|------|--------------------|------------------------------------------------------|
| A    | Intervention group | Ferrous succinate, 100mg, tid. Vitamin C, 200mg tid. |
| B    | Control group      | Ferrous succinate, 100mg, tid.                       |

168

169 **5.3 Dosing Compliance**

170 The box and aluminum cardboard of medication packages need return to  
 171 investigators when follow up. Patients should be emphasized to return the entire  
 172 pharmaceutical package, including the one remaining pharmaceutical package,  
 173 which can help researchers to calculate the information of dosing. Patients who  
 174 took vitamin C also needed to return drug bottle every two weeks, which can help  
 175 us to determine how much drug was available. Dosing compliance is defined as the  
 176 ratio of actual dosage to the standard dosage. Actual dosage must within  $\pm 20\%$  of

177 the standard. Chi-square test will be performed to compare the differences in  
178 compliance between two groups.

179

#### 180 **5.4 Drug Storage**

181 The research drugs are stored by research unit, distributed to the patients in  
182 batches, and stored in a dry, dark environment.

183

#### 184 **6. Randomization**

185 Randomization is performed using the statistic software STATA 11.0 by a  
186 centralized randomization procedure. The opaque, sealed and sequentially  
187 numbered randomization envelopes will be shuffled. After baseline measurements,  
188 eligible patients open a sealed envelope containing the information of the assigned  
189 randomization group at 1:1 ratio.

190

#### 191 **7. Sample Size**

192 Sample size calculations were performed for change in Hb from baseline using an  
193 equivalence design, with bounds of  $\pm 10$ g/L for the mean difference,  $\alpha=5\%$ ,  
194  $\beta=10\%$ , and a significance level of 0.05, assuming no difference between  
195 groups and a common SD of 15g/L, allowable error of 5g/L; a total sample size of  
196 392 participants assuming an allocation ratio of 1:1 would correspond to a power  
197 of 90%. Considering a dropout rate of 10%, 440 patients in total were enrolled in  
198 the study.

199

#### 200 **8. Endpoint evaluation**

##### 201 **8.1 Primary endpoint**

202 The primary endpoint is change in Hemoglobin (Hb) from baseline to 2 weeks of  
203 medication follow-up.

204

##### 205 **8.2 Secondary endpoints**



- 206 • Change in the Reticulocyte percentage (Ret%) after 2 weeks of treatment.
- 207 • Increase in Hemoglobin after 4 weeks of medication follow-up.
- 208 • Increase in Serum Ferritin after 8 weeks of treatment.
- 209 • Adverse events.
- 210 • Exploratory outcomes include MCV, MCH, and MCHC every 2 weeks at all time
- 211 points and serum iron, TFs, TIBC at 8 weeks.

212

213 **9. Study Flow Chat**

214

215

216

217

218

219

220

221

222

223

224

225

226

227

228

229

230

231

232

233

234

235

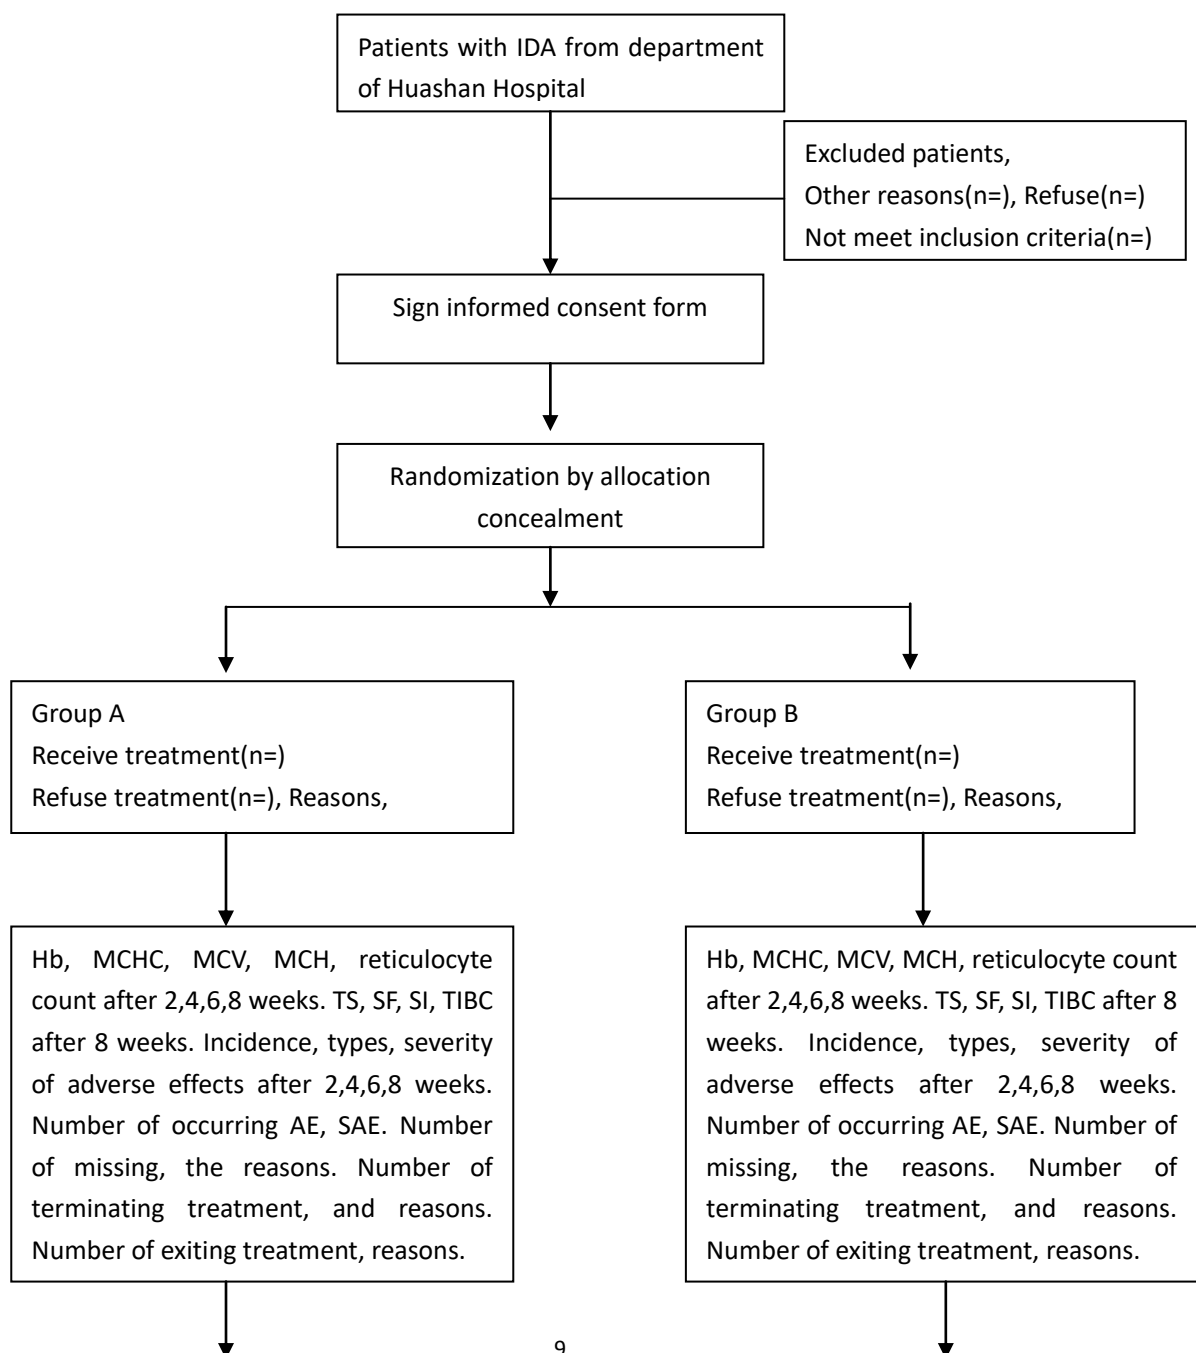

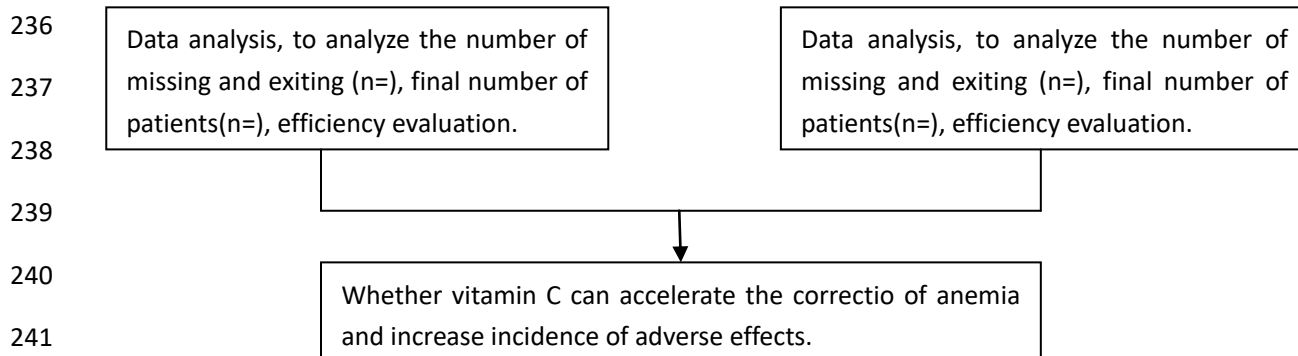

244 **10. Regulations of Reporting of Adverse Events**

245 **10.1 Adverse events (AE)**

246 Adverse events (AEs) refer to unfavorable medical events, which occur during  
 247 clinical trials, whether the events are relevant to the trial or not. The investigators  
 248 should follow up the adverse events until they disappear or stabilize and analysis  
 249 the pathogens to determine the relationship between adverse event and research  
 250 drug, which can be divided into: certainly related, possibly related, possibly  
 251 unrelated, and certainly irrelevant. All adverse events that occur during the study  
 252 must be reported in the adverse event table.

253 **10.1.1 Classification of relation between adverse events and drugs**

|                       | Have Temporal relation with Research drug | Conform to the types of adverse effects | Adverse events alleviate after discontinuation | Adverse events present again after dosing | Situation can't be explained by progression and treatment |
|-----------------------|-------------------------------------------|-----------------------------------------|------------------------------------------------|-------------------------------------------|-----------------------------------------------------------|
| Certainly related     | +                                         | +                                       | +                                              | +                                         | +                                                         |
| Very Possibly related | +                                         | +                                       | +                                              | ?                                         | +                                                         |
| Possibly related      | +                                         | +                                       | ±                                              | ?                                         | -                                                         |
| Possible unrelated    | -                                         | -                                       | ±                                              | ?                                         | ±                                                         |

---

Certainly            -            -            -            -            -  
 unrelated

---

254 Note: +, positive; - negative; ± Uncertain; ? unknown

255

256

257 **10.1.2 Judgment for severity of adverse events**

---

|             |                                                              |
|-------------|--------------------------------------------------------------|
| Mild AE     | Mild symptoms and do not develop, generally no treatment     |
| Moderate AE | Obvious symptoms, Moderate damage to organs or system        |
| Severe AE   | Serious damage to organs or system, shorten or endanger life |

---

258

259

260

261 **10.2 Serious Adverse Event, SAE**

262 SAE is adverse events that resulted in death, life-threatening situation,  
 263 hospitalization, lengthening the time of hospitalization, disability, congenital  
 264 abnormalities or birth defects. Patients are advised to return to the hospital in  
 265 time or go to local hospital for treatment. The primary investigator or other  
 266 participants should be present when patients occurred SAE. If necessary, the trial  
 267 should be stopped immediately. Primary investigator should report the events to  
 268 corresponding administrative department or the ethics committee of institution  
 269 within 24 hours. The presentation of serious adverse events should use standard  
 270 form provided by SFDA.

271

272 **10.3 Pregnancy**

273 The drugs in this study are safe for pregnant women. If patients are pregnant  
 274 during the trial, the pregnancy report form of clinical trial is required. They need  
 275 to be followed up to the birth of fetus. Investigators need close observation of the  
 276 details of birth to know about the events of abortion, automatic termination of  
 277 pregnancy and fetal malformation, etc.

278

**279 10.4 Overdose**

280 Overdose should be reported to clinical researcher within 24 hours. Researchers  
281 should report the corresponding medication. If it occurs serious consequences or  
282 symptoms that meet SAE assessment criteria, clinicians should take rescue  
283 measures and report to relevant administrative department of ethics committee  
284 within 24 hours. Primary investigator fills SAE report form.

285

**286 11. Data management**

287 The researchers must ensure the authenticity, completeness and reliability of  
288 clinical data. Any corrections should be underlined, indicated, signed and dated by  
289 the investigators. Original records should not be covered. Items for laboratory  
290 examination should be complete. Clinical data must be input by professional  
291 person. Dr. Wang will monitor multiple aspects of data validity, including consent  
292 documents, inclusion and exclusion criteria, AEs and other important daily data.  
293 The data will be kept for more than 5 years.

294

**295 12. Statistical analysis.**

296 Analysis of primary endpoint and secondary endpoint are following the basic  
297 principles of intention to Treat (ITT) approach to define the full analysis set. All  
298 randomized patients will be included in full analysis set for analysis. The missing  
299 data of efficacy evaluation will be estimated by last observation carried forward  
300 (LOCF).

301 Baseline characteristics and summary statistics will be described by treatment  
302 group. Continuous variables will be summarized using descriptive statics, such as  
303 numbers of subjects, means with standard deviations, medians with interquartile  
304 ranges for non-normal data, and categorical data by counts and proportions.

305 Qualitative variables will be summarized by frequency and percentage.

306 Results with normal distributions are presented as mean values ( $\pm$ SD).

307 Comparisons of ages, the baseline of Complete Blood Count and iron metabolism

308 parameters between the study groups are performed with a t-test. Comparisons  
309 of genders and the incidence of adverse reactions between the two groups, which  
310 do not subject to normal distributions, will base on a X2 test. Confidence intervals  
311 (95%) for the difference of the changes in Hb level between two groups were  
312 calculated at each time point, and the equivalence was evaluated using the  
313 predefined margins of equivalence ( $\pm 10\text{g/L}$ ). Efficacy variables were analyzed on  
314 an intention-to-treat. If patients drop out, missing data were imputed by  
315 Last-Observation-Carried-Forward (LOCF) method. For the analysis of adverse  
316 events, patients who accepted oral iron tablets were included in the safety  
317 population. The threshold of a statistical significance is set as a P-value smaller  
318 than 0.05. All tests were performed using STATA version 11.0.

319

320

### 321 **13. Quality Control**

322 (1) The research group should include one primary investigator and 2-4 research  
323 members. The study should be conducted strictly in the accordance to the  
324 research procedure.

325 (2) The research group must establish standard operating procedures and quality  
326 control procedures for clinical data, which should be measured in the units  
327 specified by state. Clinical reports should include dates, types of tests, results,  
328 normal ranges, and researchers' signatures.

329 (3) Ethics committee and primary investigator should review the implementation  
330 of clinical trials on time and check the subjects' compliance and data authenticity.

331

### 332 **14. Ethical Standard**

333 The ethics committee of Huashan Hospital, Fudan University approved the  
334 research plan, research form and informed consent form. Dr. Wang, the  
335 research director, is responsible for submitting the protocol, the informed consent  
336 and other relevant document to the ethical committee and obtaining approval for  
337 trial. The investigators or authorized person will be responsible for explaining the  
338 benefits and risks in this study to each patient. The patients should sign informed

339 consent before they are enrolled this study. All informed consent forms signed  
340 and dated by patients or investigators keep his/her legal representative. Any  
341 changes to the research protocol must be approved by the ethics committee. The  
342 clinical trial is followed up by Ethics Committee and in compliance with Helsinki  
343 Declaration.

344

345 **14. References**

- 346 1. Brugnara C. A hematologic "gold standard" for iron-deficient states? *Clin. Chem.* Jul  
347 2002;48(7):981-982.
- 348 2. Camaschella C. Iron-deficiency anemia. *N. Engl. J. Med.* May 7 2015;372(19):1832-1843.
- 349 3. Moretti D, Goede JS, Zeder C, et al. Oral iron supplements increase hepcidin and decrease iron  
350 absorption from daily or twice-daily doses in iron-depleted young women. *Blood.* Oct 22  
351 2015;126(17):1981-1989.
- 352 4. By Ronald Hoffman EJB, Jr, Leslie E. Silberstein, Helen Heslop, John Anastasi, Jeffrey Weitz.  
353 *Hematology: Basic Principles and Practice.* .  
354 : Elsevier Health Sciences; 2017.
- 355 5. Sayers MH, Lynch SR, Charlton RW, Bothwell TH, Walker RB, Mayet F. Iron absorption from rice  
356 meals cooked with fortified salt containing ferrous sulphate and ascorbic acid. *Br. J. Nutr.* May  
357 1974;31(3):367-375.
- 358 6. Cook JD, Monsen ER. Vitamin C, the common cold, and iron absorption. *Am. J. Clin. Nutr.* Feb  
359 1977;30(2):235-241.
- 360 7. Cook JD, Reddy MB. Effect of ascorbic acid intake on nonheme-iron absorption from a complete  
361 diet. *Am. J. Clin. Nutr.* Jan 2001;73(1):93-98.
- 362 8. Hallberg L, Brune M, Rossander L. Effect of ascorbic acid on iron absorption from different  
363 types of meals. Studies with ascorbic-acid-rich foods and synthetic ascorbic acid given in  
364 different amounts with different meals. *Hum. Nutr. Appl. Nutr.* Apr 1986;40(2):97-113.
- 365 9. Rocha DD, Capanema FD, Netto MP, de Almeida CAN, Franceschini SDC, Lamounier JA.  
366 Effectiveness of fortification of drinking water with iron and vitamin C in the reduction of  
367 anemia and improvement of nutritional status in children attending day-care centers in Belo  
368 Horizonte, Brazil. *Food and Nutrition Bulletin.* Dec 2011;32(4):340-346.
- 369 10. Hunt JR, Gallagher SK, Johnson LK. Effect of ascorbic acid on apparent iron absorption by  
370 women with low iron stores. *Am. J. Clin. Nutr.* Jun 1994;59(6):1381-1385.
- 371 11. Sadowski ZP, Alexander JH, Skrabucha B, et al. Multicenter randomized trial and a systematic  
372 overview of lidocaine in acute myocardial infarction. *Am. Heart J.* May 1999;137(5):792-798.

373  
374  
375  
376 **15. Serious Adverse Event Report Form**

|                                                                                     |  |     |  |
|-------------------------------------------------------------------------------------|--|-----|--|
| Project number/name                                                                 |  |     |  |
| Primary investigator                                                                |  | Tel |  |
| Institution                                                                         |  |     |  |
| Sponsor                                                                             |  | Tel |  |
| <b>1.Information of subjects</b>                                                    |  |     |  |
| Code of subject                                                                     |  |     |  |
| Time of happening SAE                                                               |  |     |  |
| <b>2. Description of SAE (General conditions, examinations, cause analysis, and</b> |  |     |  |

**treatment)**

### **3. Information of research drug**

Name of research drug (Chinese)

Name of research drug (English)

Dosage per day, Administration Route,

Date, Drug combination,

### **4. Serious adverse events**

#### **4.1. Classification of SAE**

Hospitalization lengthening time of Hospitalization Disability

Influence the work congenital malformation life-threatening

Others

#### **4.2 Relation between SAE and research drug**

Certainly, related very possibly related possibly related

Possibly unrelated cannot evaluate

### **5. Management for research drug**

Continue treatment reduce the dosage transient termination

terminate treatment

### **6. Transformation of SAE**

Symptom vanish, no complication Symptom vanish, complications.

Persistent symptom, to date Under treatment

Death, Date of death



7. Concomitant medications and underlying diseases (list combined medications and underlying diseases, include the dosage, administration route and duration)

**8. Whether adverse events are expected**

8.1. SAE is an expected adverse event and has been indicated in research plan and informed consent form.

8.2. SAE is not an expected adverse event and has been indicated in research plan and informed consent form.

**9. measures that have taken**

Whether researchers modify research plan or informed consent form to avoid this risk.

No

Yes

Have modified research plan or informed consent form to avoid this risk.

Ready to modify research plan or informed consent form

**Signature of Primary investigator:**

**Date**

**Recommended form of reviewing**

First review of ethics committee

Emergency meeting

Bulletin

Signature of Vice Chairman

Date
