# Supplementary material for: The Efficacy and Safety of Vitamin C for Iron Supplementation in Adult Patients With Iron Deficiency Anemia: A Randomized Clinical Trial
Source: PubMed Central journal article supplement (PMC7607440; doi:10.1001/jamanetworkopen.2020.23644), 2020-11-02
Supplement: jamanetwopen-e2023644-s002.pdf [file jamanetwopen-e2023644-s002.pdf]

1  
2  
3  
4  
5  
6  
7  
8  
9  
10  
11  
12  
13  
14  
15  
16  
17  
18  
19  
20  
21  
22

# **The Efficacy and Safety of Vitamin C for Iron Supplementation in Adult Patients with Iron Deficiency Anemia**

A single center, Randomized Control Study

Huashan Hospital authorization ID: KY2015-270

ClinicalTrials.gov ID: NCT02631668

## **Statistical Analysis Plan**

**Statistical Advisor:**

Xiaoqin Wang, MD, Ph.D., Department of Hematology, Huashan  
Hospital, Fudan University

**Statistical Analyst:**

Nianyi Li, MD, Department of Hematology, Huashan Hospital, Fudan  
University

23 **Abbreviations and Statistic descriptions**

|    |      |                                           |
|----|------|-------------------------------------------|
| 24 | CRF  | Case Report Form                          |
| 25 | FAS  | Full Analysis Set                         |
| 26 | Q    | Quartile                                  |
| 27 | Max  | Maximum                                   |
| 28 | Min  | Minimum                                   |
| 29 | PPS  | Per Protocol Set                          |
| 30 | SS   | Safety Set                                |
| 31 | SD   | Standard Deviation                        |
| 32 | CI   | Confidence Interval                       |
| 33 | ITT  | Intent to Treat                           |
| 34 | LOCF | Last Observation Carried Forward          |
| 35 | AE   | Adverse Event                             |
| 36 | SAE  | Serious Adverse Event                     |
| 37 | MCV  | Mean Corpuscular Volume                   |
| 38 | MCH  | Mean Corpuscular Hemoglobin               |
| 39 | MCHC | Mean Corpuscular Hemoglobin Concentration |
| 40 | Hb   | Hemoglobin                                |
| 41 | SI   | Serum Iron                                |
| 42 | TIBC | Total Iron Binding Capacity               |
| 43 | SF   | Serum Ferritin                            |
| 44 | TS   | Transferrin Saturation                    |
| 45 | ID   | Iron Deficiency                           |
| 46 | IDE  | Iron Deficiency erythropoiesis            |
| 47 | IDA  | Iron Deficiency Anemia                    |
| 48 | RCT  | Randomized Control Study                  |

49  
50  
51  
52

53 **Background**

54 Iron deficiency anemia (IDA) is associated with a decrease in erythropoiesis  
55 caused by a deficit in total body iron.<sup>1</sup> Iron deficiency is the leading cause of  
56 anemia worldwide. According to the WHO Guideline, IDA affects 30% of the  
57 world's population, indicating that it is still a problem requiring attention.<sup>2</sup>

58 Iron deficiency can be divided into three stages: pre-latent iron deficiency, latent  
59 iron deficiency (also called iron-deficient erythropoiesis, IDE), and iron  
60 deficiency anemia (IDA). At the first stage, a lower iron intake (than the  
61 requirement) causes progressive depletion of iron storage primarily in the liver  
62 and muscle cells. This stage generally has no symptoms and is often diagnosed  
63 when serum ferritin (storage form of iron) levels drop below 20 ug/L. Continued  
64 iron storage depletion leads to the second stage, IDE phase, when iron  
65 deficiencies progress and begin to affect Erythropoiesis. In spite of an increased  
66 transferrin level, serum iron level decreases along with transferrin saturation.  
67 Erythropoiesis impairment begins when the serum iron level falls to less than 9  
68 umol/L and transferrin saturation is less than 16%.<sup>3</sup> Hemoglobin levels are still  
69 within the normal range until IDA stage. Iron storages are depleted to a point  
70 where it can no longer support the hemoglobin production required to make  
71 enough red blood cells. Deficiency impairs RBC synthesis, and hemoglobin  
72 production declines to the point where anemia develops.<sup>4</sup>

73 During the pre-latent iron deficiency phase, most situations can be treated  
74 through an iron-rich diet. However, patients diagnosed with IDA need iron  
75 supplements promptly to restore the symptoms, and more importantly,  
76 investigating and addressing the underlying causes of IDA such as  
77 iron-absorption defects and bleeding.

78 Oral iron supplementation is the major way to restore iron levels for IDA  
79 patients. Numerous non-heme iron supplements are available, among which the  
80 most commonly used are ferrous sulfate and ferric succinate. Vitamin C is the

81 only dietary constituent other than animal tissue that has been shown to  
82 promote iron absorption.<sup>5-8</sup> Iron absorption occurs predominantly in the  
83 duodenum and upper jejunum, where only ferrous iron can be transported into  
84 small intestine mucosal epithelial cells. When taken orally, iron is always  
85 oxidized to the Fe<sup>3+</sup> state from different original forms. It requires an acidic GI  
86 environment to properly dissolve and to be available for absorption. Vitamin C  
87 can create a more acidic environment in the stomach and prevent the oxidization  
88 of ferrous iron to ferric iron.<sup>9</sup> However, in a series of 12 individuals treated with  
89 iron during an intake of a normal or vitamin C supplemented diet, the  
90 augmentation of vitamin C on iron absorption from a complete diet is far less  
91 pronounced than that from a single meal. The facilitating effect in iron status of  
92 vitamin C with a complete diet has been minimal.<sup>7,10</sup> Therefore, whether Vitamin  
93 C has additional advantages, such as improving the efficacy of the iron tablets,  
94 speeding up the recovery of anemia, should be reconsidered. Some doctors might  
95 recommend taking iron tablets with vitamin C supplements while others may not.  
96 Their experience-based recommendations lack a support from clinical evidence  
97 through Randomized Controlled Trial (RCT), which is considered to be the most  
98 reliable form of scientific evidence.

99 With the rising of concept of evidence-based medicine, some shortcomings of  
100 empirical medicine were gradually exposed. For example, most experts used  
101 lidocaine as standard treatment for acute myocardial infarction until 1999, when  
102 Sadowski et al evaluated totally 21 randomized controlled trials (RCTs). The  
103 result showed that in patients receiving lidocaine treatment, although the  
104 incidence of ventricular fibrillation in patients with acute myocardial infarction  
105 was reduced, the mortality increased significantly. It concluded that using  
106 lidocaine to prevent ventricular fibrillation in patients with acute myocardial  
107 infarction was not recommended<sup>11</sup>. We believe that pathophysiological or  
108 mechanistic feasibility may not be able to achieve desired results in patients.

109 Evidence-based medicine emphasizes that randomized controlled trial (RCT), as  
110 a gold standard for efficacy evaluation, should be apply for all therapies.

111 Therefore, it is necessary to conduct a rigorous RCT study to evaluate whether  
112 vitamin C can increase the iron supplements efficacy. We designed a  
113 single-center, randomized controlled, equivalent clinical trial to study the  
114 efficacy and safety between taking iron pills only and with vitamin C  
115 supplements. The aim of this study was to evaluate whether vitamin C  
116 supplements can speed up the recovery of IDA and whether this produces any  
117 side effects, such as increased gastrointestinal irritation stimulated by iron  
118 therapy itself.

119

### 120 **Primary Objective**

121 To explore whether oral iron tablets supplemented with vitamin C can speed up  
122 the recovery of IDA stimulated by iron therapy itself.

123

### 124 **Secondary Objective**

125 To explore whether vitamin C supplement increases the incidence of the adverse  
126 events, such as increased gastrointestinal irritation stimulated by iron therapy  
127 itself.

128

### 129 **Research Design**

130 This study is an open-label, randomized, single-center clinical trial. Patients will  
131 be randomized to two groups using STATA 11.0 software. Participants are  
132 randomly assigned (1:1) to the oral iron tablets supplemented with vitamin C  
133 group or the oral iron tablets used as single-drug treatment group. Patients are  
134 randomized to receive 100mg oral iron tablet plus 200mg vitamin C  
135 supplements every 8 hours daily (n=220) or 100mg iron tablet every 8 hours  
136 (n=220) for 3 months.

### 137 **Drugs**

138 Research drugs

---

| Drug | Form | Specification | Storage | Lot. | Company |
|------|------|---------------|---------|------|---------|
|------|------|---------------|---------|------|---------|

---

|                   |        |             |                                     |                        |                                           |
|-------------------|--------|-------------|-------------------------------------|------------------------|-------------------------------------------|
| ferrous succinate | tablet | 0.1g/tablet | Shading, Airtight, Room temperature | SFDA number, H20083003 | Sichuan, Aobang pharmaceutical co., Ltd.  |
| Vitamin C         | tablet | 0.1g/tablet | Shading, Airtight, Room temperature | SFDA number, H42020614 | Hubei, Huazhong, pharmaceutical co., Ltd. |

139 The Vitamin C was provided by Hubei Huazhong Pharmaceutical Co., Ltd. in free  
140 of charge.

141

142 **Treatment regimen**

| Code | Group              | Treatment                                            |
|------|--------------------|------------------------------------------------------|
| A    | Intervention group | Ferrous succinate, 100mg, tid. Vitamin C, 200mg tid. |
| B    | Control group      | Ferrous succinate, 100mg, tid.                       |

143

144 **Randomization**

145 Randomization is performed using the statistic software STATA 11.0 by a  
146 centralized randomization procedure. The opaque, sealed and sequentially  
147 numbered randomization envelopes will be shuffled. After baseline  
148 measurements, eligible patients open a sealed envelope containing the  
149 information of the assigned randomization group at 1:1 ratio.

150

151 **Sample Size**

152 Sample size calculations were performed for change in Hb from baseline using an  
153 equivalence design, with bounds of  $\pm 10$ g/L for the mean difference,  $\alpha=5\%$ ,  
154  $\beta=10\%$ , and a significance level of 0.05, assuming no difference between

155 groups and a common SD of 15g/L, allowable error of 5g/L; a total sample size of  
 156 392 participants assuming an allocation ratio of 1:1 would correspond to a  
 157 power of 90%. Considering a dropout rate of 10%, 440 patients in total were  
 158 enrolled in the study.

159 **Primary endpoint**

160 The primary endpoint is change in Hemoglobin (Hb) from baseline to 2 weeks of  
 161 medication follow-up.

162

163 **Secondary endpoints**

- 164 • Change in the Reticulocyte percentage (Ret%) after 2 weeks of treatment.
- 165 • Increase in Hemoglobin after 4 weeks of medication follow-up.
- 166 • Increase in Serum Ferritin after 8 weeks of treatment.
- 167 • Adverse events.
- 168 • Exploratory outcomes include MCV, MCH, and MCHC every 2 weeks at all  
 169 time points and serum iron, TFs, TIBC at 8 weeks.

170

171 **Adverse Event**

172 Adverse events (AEs) refer to unfavorable medical events, which occur during  
 173 clinical trials, whether the events are relevant to the trial or not. The  
 174 investigators should follow up the adverse events until they disappear or  
 175 stabilize and analysis the pathogens to determine the relationship between  
 176 adverse event and research drug, which can be divided into: certainly related,  
 177 possibly related, possibly unrelated, and certainly irrelevant. All adverse events  
 178 that occur during the study must be reported in the adverse event table.

179 **Classification of relation between adverse events and drugs**

---

|               |              |                 |         |                 |
|---------------|--------------|-----------------|---------|-----------------|
| Have          | Conform to   | Adverse events  | Adverse | Situation can't |
| Temporal      | the types of | alleviate       | after   | events present  |
| relation with | adverse      | discontinuation | again   | after           |
| Research      | effects      |                 | dosing  | by              |
|               |              |                 |         | progression     |

---

|                      | drug |   |   |   | and treatment |
|----------------------|------|---|---|---|---------------|
| certainly related    | +    | + | + | + | +             |
| possibly related     | +    | + | + | / | +             |
| certainly irrelevant | -    | - | - | - | -             |
| possibly unrelated   | -    | - | / | / | /             |

180 • Note,+ positive ; - negative; /, uncertain.

181

182 **Collections of Adverse Events**

|                                        | Intervention Group | Control Group |
|----------------------------------------|--------------------|---------------|
| Adverse Event                          | N, (%)             | N, (%)        |
| All adverse events                     |                    |               |
| Adverse event related to research drug |                    |               |
| Serious Adverse event                  |                    |               |
| All serious adverse events             |                    |               |
| Adverse event related to research drug |                    |               |
| Death                                  |                    |               |

183

184 **Serious Adverse Event, SAE**

185 SAE is adverse events that resulted in death, life-threatening situation,  
186 hospitalization, lengthening the time of hospitalization, disability, congenital  
187 abnormalities or birth defects. Patients are advised to return to the hospital in  
188 time or go to local hospital for treatment. The primary investigator or other  
189 participants should be present when patients occurred SAE. If necessary, the trail  
190 should be stopped immediately. Primary investigator should report the events to  
191 corresponding administrative department or the ethics committee of institution  
192 within 24 hours. The presentation of serious adverse events should use standard  
193 form provided by SFDA.

194

195 **Statistical analysis**



196 **Full Analysis Set, FAS**

197 Analysis of primary endpoint and secondary endpoint are following the basic  
198 principles of intention to Treat (ITT) approach to define the full analysis set. All  
199 randomized patients will be included in full analysis set for analysis. The missing  
200 data of efficacy evaluation will be estimated by last observation carried forward  
201 (LOCF).

202

203 **Safety Set, SS**

204 Patients who take research drug once should be included in safety set. The Safety  
205 Population is used for the analysis of safety, including adverse events, toxicity  
206 and laboratory evaluations.

207

208 **Statistical Analysis**

209 Baseline characteristics and summary statistics will be described by treatment  
210 group. Continuous variables will be summarized using descriptive statics, such as  
211 numbers of subjects, means with standard deviations, medians with interquartile  
212 ranges for non-normal data, and categorical data by counts and proportions.

213 Qualitative variables will be summarized by frequency and percentage.

214 Results with normal distributions are presented as mean values ( $\pm$ SD).

215 Comparisons of ages, the baseline of Complete Blood Count and iron metabolism  
216 parameters between the study groups are performed with a t-test. Comparisons  
217 of genders and the incidence of adverse reactions between the two groups, which  
218 do not subject to normal distributions, will base on a X2 test. Confidence  
219 intervals (95%) for the difference of the changes in Hb level between two groups  
220 were calculated at each time point, and the equivalence was evaluated using the  
221 predefined margins of equivalence ( $\pm$ 10g/L). Efficacy variables were analyzed on  
222 an intention-to-treat. If patients drop out, missing data were imputed by  
223 Last-Observation-Carried-Forward (LOCF) method. For the analysis of adverse  
224 events, patients who accepted oral iron tablets were included in the safety  
225 population. The threshold of a statistical significance is set as a P-value smaller

226 than 0.05. All tests were performed using STATA version 11.0.

227

228 **Case distribution**

229 This part includes summarizing how many patients enroll and complete the trial,  
230 describing the number of safety and valid analytical data set, and listing the data.

231 **Case distribution (Unit: Case)**

|            | Intervention<br>Group | Control<br>Group | Total |
|------------|-----------------------|------------------|-------|
| Enrollment |                       |                  |       |
| FAS        |                       |                  |       |
| PPS        |                       |                  |       |
| SS         |                       |                  |       |

232

233 **Enrollment and missing number (Unit: Case)**

|                                | Intervention<br>Group<br>(N,%) | Control<br>Group<br>(N,%) |
|--------------------------------|--------------------------------|---------------------------|
| Enrollment Number              |                                |                           |
| Number of Completing treatment |                                |                           |
| Number of missing              |                                |                           |
| Inclusion inconformity         |                                |                           |
| Violation of research plan     |                                |                           |
| Refuse to treat                |                                |                           |
| Loss of follow up              |                                |                           |
| Death                          |                                |                           |

234

235

236 **Number of completing treatment (Unit: case)**

|         | Intervention<br>Group | Control<br>Group | Total1 |
|---------|-----------------------|------------------|--------|
| 2 weeks |                       |                  |        |
| 4 weeks |                       |                  |        |
| 6 weeks |                       |                  |        |
| 8 weeks |                       |                  |        |

237

238 **Comparison of demographics and baseline**

| Variables | Intervention<br>Group | Control<br>Group | P value |
|-----------|-----------------------|------------------|---------|
| Gender    |                       |                  |         |
| M/F       |                       |                  |         |

---

Age (years)  
WBC( $\times 10^9/L$ )  
RBC( $\times 10^{12}/L$ )  
PLT( $\times 10^9/L$ )  
MCV (fl)  
MCHC(g/L)  
MCH (pg)  
SF  
TIBC (%)  
Clinical symptom (N, %)  
Yes  
No

---

239

240 **Dosing Compliance**

241 The box and aluminum cardboard of medication packages need return to  
242 investigators when follow up. Patients should be emphasized to return the entire  
243 pharmaceutical package, including the one remaining pharmaceutical packages,  
244 which can help researchers to calculate the information of dosing. Patients who  
245 took vitamin C also needed to return drug bottle every two weeks, which can  
246 help us to determine how much drug was available. Dosing compliance is defined  
247 as the ratio of actual dosage to the standard dosage. Actual dosage must within  
248  $\pm 20\%$  of the standard. Chi-square test will be performed to compare the  
249 differences in compliance between two groups.

250

251 **Evaluation of CBC**

| Variables  | Intervention Group | Control Group | P value |
|------------|--------------------|---------------|---------|
| Hb0(g/L)   |                    |               |         |
| Hb2(g/L)   |                    |               |         |
| Hb4(g/L)   |                    |               |         |
| Hb6(g/L)   |                    |               |         |
| Hb8(g/L)   |                    |               |         |
| MCV0(fl)   |                    |               |         |
| MCV2(fl)   |                    |               |         |
| MCV4(fl)   |                    |               |         |
| MCV6(fl)   |                    |               |         |
| MCV8(fl)   |                    |               |         |
| MCHC0(g/L) |                    |               |         |

---

---

MCHC<sub>2</sub>(g/L)  
MCHC<sub>4</sub>(g/L)  
MCHC<sub>6</sub>(g/L)  
MCHC<sub>8</sub>(g/L)  
MCH<sub>0</sub>(pg)  
MCH<sub>2</sub>(pg)  
MCH<sub>4</sub>(pg)  
MCH<sub>6</sub>(pg)  
MCH<sub>8</sub>(pg)

---

252 Note, Hb<sub>0</sub>, Hemoglobin level of baseline. Hb<sub>2</sub>, hemoglobin level after 2 weeks. Hb<sub>4</sub>,  
253 hemoglobin level after 4 weeks. Hb<sub>6</sub>, hemoglobin level after 6 weeks. Hb<sub>8</sub>,  
254 hemoglobin level after 8 weeks. MCV<sub>0</sub>, MCV level of baseline. MCV<sub>2</sub>, MCV level  
255 after 2 weeks. MCV<sub>4</sub>, MCV level after 4 weeks. MCV<sub>6</sub>, MCV level after 6 weeks.  
256 MCV<sub>8</sub>, MCV level after 8 weeks. MCH<sub>0</sub>, MCH level of baseline. MCH<sub>2</sub>, MCH level  
257 after 2 weeks. MCH<sub>4</sub>, MCH level after 4 weeks. MCH<sub>6</sub>, MCH level after 6 weeks.  
258 MCH<sub>8</sub>, MCH level after 8 weeks. MCHC<sub>0</sub>, MCHC level of baseline. MCHC<sub>2</sub>, MCHC  
259 level after 2 weeks. MCHC<sub>4</sub>, MCHC level after 4 weeks. MCHC<sub>6</sub>, MCHC level after 6  
260 weeks. MCHC<sub>8</sub>, MCHC level at 8 weeks.

261

262 **Evaluation of iron metabolism indexes**

---

| Variables               | Intervention Group | Control Group | P value |
|-------------------------|--------------------|---------------|---------|
| SF <sub>0</sub> (µg/ml) |                    |               |         |
| SF <sub>8</sub> (µg/ml) |                    |               |         |
| TS <sub>0</sub> (%)     |                    |               |         |
| TS <sub>8</sub> (%)     |                    |               |         |
| TIBC <sub>0</sub> (%)   |                    |               |         |
| TIBC <sub>8</sub> (%)   |                    |               |         |

---

263 Note: SF<sub>0</sub>, serum ferritin at baseline; SF<sub>8</sub>, serum ferritin after 8 weeks; TS<sub>0</sub>,  
264 transferrin saturation of baseline; TS<sub>8</sub>, transferrin saturation after 8 weeks' time.  
265 TIBC<sub>0</sub>, total iron binding capacity at baseline; TIBC<sub>8</sub>, total iron binding capacity  
266 after 8 weeks.

267

268

269 **Evaluation of adverse effects**

---

| Variables                                 | Intervention Group | Control Group | P value |
|-------------------------------------------|--------------------|---------------|---------|
| Incidence of adverse effects after 2weeks |                    |               |         |
| Classification and Severity after 2 weeks |                    |               |         |
| Nausea (N, %)                             |                    |               |         |
| Vomiting (N, %)                           |                    |               |         |
| Abdominal pain (N, %)                     |                    |               |         |
| Diarrhea (N, %)                           |                    |               |         |

---

---

Incidence of adverse effects after 4 weeks

Classification and Severity after 4 weeks

Nausea (N, %)

Vomiting (N, %)

Abdominal pain (N, %)

Diarrhea (N, %)

Incidence of adverse effects after 6 weeks

Classification and Severity after 6 weeks

Nausea (N, %)

Vomiting (N, %)

Abdominal pain (N, %)

Diarrhea (N, %)

Incidence of adverse effects after 8 weeks

Classification and Severity after 8 weeks

Nausea (N, %)

Vomiting (N, %)

Abdominal pain (N, %)

Diarrhea (N, %)

---

270

271

272

## 273 Reference

- 274 1. Brugnara C. A hematologic "gold standard" for iron-deficient states? *Clin. Chem.* Jul  
275 2002;48(7):981-982.
- 276 2. Camaschella C. Iron-deficiency anemia. *N. Engl. J. Med.* May 7 2015;372(19):1832-1843.
- 277 3. Moretti D, Goede JS, Zeder C, et al. Oral iron supplements increase hepcidin and decrease  
278 iron absorption from daily or twice-daily doses in iron-depleted young women. *Blood.*  
279 Oct 22 2015;126(17):1981-1989.
- 280 4. By Ronald Hoffman EJB, Jr, Leslie E. Silberstein, Helen Heslop, John Anastasi, Jeffrey  
281 Weitz. *Hematology: Basic Principles and Practice.* .  
282 : Elsevier Health Sciences; 2017.
- 283 5. Sayers MH, Lynch SR, Charlton RW, Bothwell TH, Walker RB, Mayet F. Iron absorption  
284 from rice meals cooked with fortified salt containing ferrous sulphate and ascorbic acid.  
285 *Br. J. Nutr.* May 1974;31(3):367-375.
- 286 6. Cook JD, Monsen ER. Vitamin C, the common cold, and iron absorption. *Am. J. Clin. Nutr.*  
287 Feb 1977;30(2):235-241.
- 288 7. Cook JD, Reddy MB. Effect of ascorbic acid intake on nonheme-iron absorption from a  
289 complete diet. *Am. J. Clin. Nutr.* Jan 2001;73(1):93-98.
- 290 8. Hallberg L, Brune M, Rossander L. Effect of ascorbic acid on iron absorption from

291 different types of meals. Studies with ascorbic-acid-rich foods and synthetic ascorbic  
292 acid given in different amounts with different meals. *Hum. Nutr. Appl. Nutr.* Apr  
293 1986;40(2):97-113.

294 **9.** Rocha DD, Capanema FD, Netto MP, de Almeida CAN, Franceschini SDC, Lamounier JA.  
295 Effectiveness of fortification of drinking water with iron and vitamin C in the reduction of  
296 anemia and improvement of nutritional status in children attending day-care centers in  
297 Belo Horizonte, Brazil. *Food and Nutrition Bulletin.* Dec 2011;32(4):340-346.

298 **10.** Hunt JR, Gallagher SK, Johnson LK. Effect of ascorbic acid on apparent iron absorption by  
299 women with low iron stores. *Am. J. Clin. Nutr.* Jun 1994;59(6):1381-1385.

300 **11.** Sadowski ZP, Alexander JH, Skrabucha B, et al. Multicenter randomized trial and a  
301 systematic overview of lidocaine in acute myocardial infarction. *Am. Heart J.* May  
302 1999;137(5):792-798.

303

304
